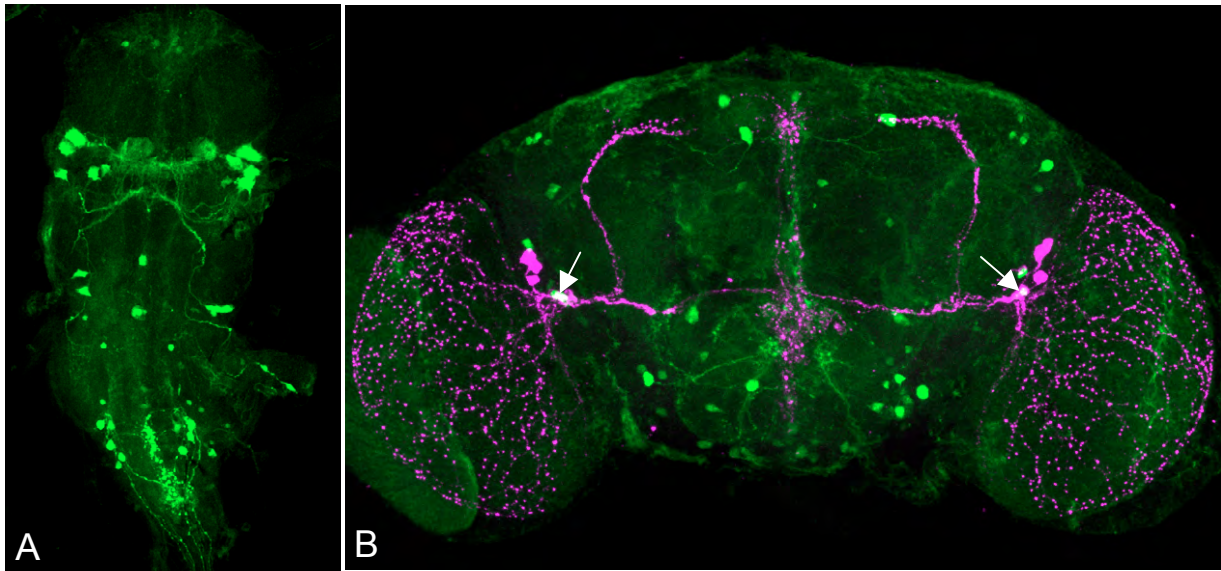

**Fig. S1.** GFP driven by the *R6-GAL4* driver in the thoracic-abdominal nervous system (A) and in the brain (B). The brain is double-labelled by anti-PDF. The arrows point to the s-LN<sub>v</sub>.
